# Supplementary material for: Identification of a novel mechanism of action of fingolimod (FTY720) on human effector T cell function through TCF-1 upregulation
Source: Springer Nature journal article supplement (doi:10.1186/s12974-015-0460-z), 2015-12-01
Supplement: MOESM1 [file 9768976]

## Supplementary table 1

| <b>MS Patient's characteristics</b>      |                          |
|------------------------------------------|--------------------------|
| Age in years [Mean (s.d.), range]        | 44 ( $\pm 9.5$ ), 26-54  |
| Gender<br>Male [N (%)]<br>Female [N (%)] | 13 (27.6%)<br>34 (72.4%) |
| Disease duration [Mean (s.d.), range]    | 12.4 ( $\pm 7.2$ ), 1-34 |
| EDSS [Mean (s.d.), range]                | 1.4 ( $\pm 0.9$ ), 0-6.5 |
