# Supplementary material for: Identification of a novel mechanism of action of fingolimod (FTY720) on human effector T cell function through TCF-1 upregulation
Source: Springer Nature journal article supplement (doi:10.1186/s12974-015-0460-z), 2015-12-01

# Supplementary Figure 2

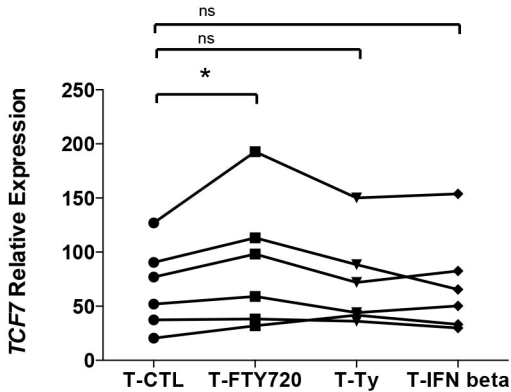

Supplement: MOESM3 [file 9768976]
